# Supplementary material for: Toxicological Comparison of Pesticide Active Substances Approved for Conventional vs. Organic Agriculture in Europe
Source: MDPI journal article supplement (doi:10.3390/toxics10120753), 2022-12-02
Supplement: s1 [file s1]

| Code           |                       | GHS Hazard Statement                                                      |
|----------------|-----------------------|---------------------------------------------------------------------------|
| HEALTH HAZARDS |                       | EN                                                                        |
| H300           | Acute Tox. 1 (oral)   | Fatal if swallowed                                                        |
| H300           | Acute Tox. 2 (oral)   | Fatal if swallowed                                                        |
| H301           | Acute Tox. 3 (oral)   | Toxic if swallowed                                                        |
| H302           | Acute Tox. 4 (oral)   | Harmful if swallowed                                                      |
| H310           | Acute Tox. 1 (dermal) | Fatal in contact with skin                                                |
| H310           | Acute Tox. 2 (dermal) | Fatal in contact with skin                                                |
| H311           | Acute Tox. 3 (dermal) | Toxic in contact with skin                                                |
| H312           | Acute Tox. 4 (dermal) | Harmful in contact with skin                                              |
| H330           | Acute Tox. 1 (inhal.) | Fatal if inhaled                                                          |
| H330           | Acute Tox. 2 (inhal.) | Fatal if inhaled                                                          |
| H331           | Acute Tox. 3 (inhal.) | Toxic if inhaled                                                          |
| H332           | Acute Tox. 4 (inhal.) | Harmful if inhaled                                                        |
|                |                       |                                                                           |
| H304           | Asp. Tox. 1           | May be fatal if swallowed and enters airways.                             |
| H334           | Resp. Sens. 1         | May cause allergy or asthma symptoms or breathing difficulties if inhaled |
|                |                       |                                                                           |
| H340           | Muta. 1B              | May cause genetic defects                                                 |
| H341           | Muta. 2               | Suspected of causing genetic defects                                      |
|                |                       |                                                                           |
| H350           | Carc. 1B              | May cause cancer                                                          |
| H351           | Carc. 2               | Suspected of causing cancer                                               |
|                |                       |                                                                           |
| H360D          | Repr. 1A              | May damage the unborn child                                               |
| H360           | Repr. 1B              | May damage fertility or the unborn child                                  |
| H360D          | Repr. 1B              | May damage the unborn child                                               |
| H360Df         | Repr. 1B              | May damage the unborn child. Suspected of damaging fertility.             |
| H360FD         | Repr. 1B              | May damage fertility. May damage the unborn child.                        |
| H361d          | Repr. 2               | Suspected of damaging the unborn child                                    |
| H361f          | Repr. 2               | Suspected of damaging fertility                                           |
| H361fd         | Repr. 2               | Suspected of damaging fertility. Suspected of damaging the unborn child.  |
|                |                       |                                                                           |
| H362           | Lact.                 | May cause harm to breast-fed children                                     |
|                |                       |                                                                           |
| H370           | STOT SE 1             | Causes damage to organs                                                   |
| H371           | STOT SE 2             | May cause damage to organs                                                |
| H335           | STOT SE 3             | May cause respiratory irritation                                          |
| H336           | STOT SE 3             | May cause drowsiness or dizziness                                         |
|                |                       |                                                                           |
| H372           | STOT RE 1             | Causes damage to organs through prolonged or repeated exposure            |
| H373           | STOT RE 2             | May cause damage to organs through prolonged or repeated exposure         |
|                |                       |                                                                           |
|                |                       |                                                                           |
| H318           | Eye Dam. 1            | Causes serious eye damage                                                 |
| H319           | Eye Irrit. 2          | Causes serious eye irritation                                             |
|                |                       |                                                                           |
| H314           | Skin Corr. 1          | Causes severe skin burns and eye damage                                   |
| H314           | Skin Corr. 1A         | Causes severe skin burns and eye damage                                   |

|                          |                   |                                                        |
|--------------------------|-------------------|--------------------------------------------------------|
| H314                     | Skin Corr. 1B     | Causes severe skin burns and eye damage                |
| H314                     | Skin Corr. 1C     | Causes severe skin burns and eye damage                |
| H315                     | Skin Irrit. 2     | Causes skin irritation                                 |
| H317                     | Skin Sens. 1      | May cause an allergic skin reaction                    |
| H317                     | Skin Sens. 1A     | May cause an allergic skin reaction                    |
| H317                     | Skin Sens. 1B     | May cause an allergic skin reaction                    |
|                          |                   |                                                        |
| ENVIRONMENTAL<br>HAZARDS |                   |                                                        |
| H400                     | Aquatic Acute 1   | Very toxic to aquatic life                             |
| H410                     | Aquatic Chronic 1 | Very toxic to aquatic life with long lasting effects   |
| H411                     | Aquatic Chronic 2 | Toxic to aquatic life with long lasting effects        |
| H412                     | Aquatic Chronic 3 | Harmful to aquatic life with long lasting effects      |
| H413                     | Aquatic Chronic 4 | May cause long lasting harmful effects to aquatic life |
