# Supplementary material for: Toxicological Comparison of Pesticide Active Substances Approved for Conventional vs. Organic Agriculture in Europe
Source: MDPI journal article supplement (doi:10.3390/toxics10120753), 2022-12-02
Supplement: s1 [file s1]

**Supplementary Table S4.** Results of Chi<sup>2</sup> tests whether the frequencies of hazard categories differ between ConvAS and OrgAS. Values in bold indicate significant results.

| Parameter                           | Df | Chi <sup>2</sup> | P                   |
|-------------------------------------|----|------------------|---------------------|
| Acute toxicity-swallowed            | 2  | 101.75           | <0.001              |
| Acute toxicity-skin contact         | 2  | 14.60            | <0.001              |
| Acute toxicity-inhalation           | 3  | 73.94            | <0.001              |
| Skin damage                         | 2  | 106.09           | <0.001              |
| Eye damage                          | 1  | 15.90            | <0.001              |
| Specific target organ toxicity STOT | 1  | 13.47            | <0.001              |
| Reproductive toxicity               | 1  | 18.10            | <0.001              |
| Carcinogenicity                     |    |                  | Test not applicable |
| Aquatic toxicity chronic            | 2  | 212.57           | <0.001              |
| Aquatic toxicity acute              |    |                  | Test not applicable |
