# Supplementary material for: Toxicological Comparison of Pesticide Active Substances Approved for Conventional vs. Organic Agriculture in Europe
Source: Toxics. 2022 Dec 2;10(12):753. doi: 10.3390/toxics10120753 (PMC9783316; doi:10.3390/toxics10120753)
Supplement: Supplementary file 1 [file toxics-10-00753-s001.zip]

Archive with 8 entries (8 files):
- __MACOSX/.__Supplementary Table S4 Chi2 results.docx
- __MACOSX/.__Supplementary_Table S1_Full list of all active substances considered for ConvAS and OrgAS, and risk ratings.xlsx
- __MACOSX/.__Supplementary_Table S3_All active substances with GHS hazard statements.xlsx
- __MACOSX/.__Supplementary_TableS2_GHS_Hazard statements.docx
- _Supplementary Table S4 Chi2 results.pdf
- _Supplementary_Table S1_Full list of all active substances considered for ConvAS and OrgAS, and risk ratings.xlsx
- _Supplementary_Table S3_All active substances with GHS hazard statements.xlsx
- _Supplementary_TableS2_GHS_Hazard statements.pdf
