# Supplementary material for: Toxicological Comparison of Pesticide Active Substances Approved for Conventional vs. Organic Agriculture in Europe
Source: Toxics. 2022 Dec 2;10(12):753. doi: 10.3390/toxics10120753 (PMC9783316; doi:10.3390/toxics10120753)
Supplement: Supplementary file 1 [file toxics-10-00753-s001.zip › _Supplementary_Table S1_Full list of all active substances considered for ConvAS and OrgAS, and risk ratings.xlsx]

## Sheet: Suppl.Tab.S2
Substance	Classification into organic and conventional production	Candidate for substitution	Basic substance	Low-risk a.s.
Allium cepa L. bulb extract	OrgAS		Yes
Aluminium silicate (aka kaolin)	OrgAS
Azadirachtin (Margosa extract)	OrgAS
Beer	OrgAS		Yes
Bordeaux mixture	OrgAS	two PBT criteria
Calcium hydroxide	OrgAS		Yes
Capric acid (CAS 334-48-5)	OrgAS
Caprylic acid (CAS 124-07-2)	OrgAS
Cerevisane	OrgAS			Yes
Chitosan hydrochloride	OrgAS		Yes
Copper hydroxide	OrgAS	two PBT criteria
Copper oxide	OrgAS	two PBT criteria
Copper oxychloride	OrgAS	two PBT criteria
COS-OGA	OrgAS			Yes
Cow Milk	OrgAS		Yes
Equisetum arvense L.	OrgAS		Yes
Eugenol	OrgAS
Extract from tea tree	OrgAS
Ferric phosphate	OrgAS			Yes
Fructose	OrgAS		Yes
Garlic extract	OrgAS
Geraniol	OrgAS
Hydrogen peroxide	OrgAS		Yes
Hydrolysed proteins	OrgAS
Kieselgur (diatomaceous earth)	OrgAS
L-cysteine	OrgAS		Yes
Laminarin	OrgAS			Yes
Lauric acid (CAS 143-07-7)	OrgAS
Lecithins	OrgAS		Yes
Lime sulphur (calcium polysulphid)	OrgAS
Maltodextrin	OrgAS
Methyl decanoate (CAS 110-42-9)	OrgAS
Methyl octanoate (CAS 111-11-5)	OrgAS
Mustard seeds powder	OrgAS		Yes
Oleic acid (CAS 112-80-1)	OrgAS
Onion oil	OrgAS		Yes
Orange oil	OrgAS
Paraffin oil/(CAS 64742-46-7)	OrgAS
Paraffin oil/(CAS 72623-86-0)	OrgAS
Paraffin oil/(CAS 8042-47-5)	OrgAS
Paraffin oil/(CAS 97862-82-3)	OrgAS
Pelargonic acid (CAS 112-05-0)	OrgAS
Plant oils / Rape seed oil	OrgAS
Potassium hydrogen carbonate	OrgAS			Yes
Pyrethrins	OrgAS
Quartz sand	OrgAS
Repellents by smell of animal or plant origin/ sheep fat	OrgAS
Salix spp. cortex	OrgAS		Yes
Sodium chloride	OrgAS		Yes
Sodium hydrogen carbonate (low risk active substance)	OrgAS			Yes
Spinosad	OrgAS
Sucrose	OrgAS		Yes
Sulphur	OrgAS
Sunflower oil	OrgAS		Yes
Thymol	OrgAS
Tribasic copper sulfate	OrgAS	two PBT criteria
Urtica spp.	OrgAS		Yes
Vinegar	OrgAS		Yes
Whey	OrgAS		Yes
Adoxophyes orana GV strain BV-0001	OrgAS
Akanthomyces muscarius Ve6 (formerly Lecanicillium muscarium strain Ve6)	OrgAS			Yes
Ampelomyces quisqualis strain AQ10	OrgAS			Yes
Aureobasidium pullulans (strains DSM 14940 and DSM 14941)	OrgAS
Bacillus amyloliquefaciens (formerly subtilis) str. QST 713	OrgAS
Bacillus amyloliquefaciens AH2	OrgAS			Yes
Bacillus amyloliquefaciens IT-45	OrgAS			Yes
Bacillus amyloliquefaciens MBI 600	OrgAS
Bacillus amyloliquefaciens strain FZB24	OrgAS			Yes
Bacillus amyloliquefaciens subsp. plantarum D747	OrgAS
Bacillus firmus I-1582	OrgAS
Bacillus pumilus QST 2808	OrgAS
Bacillus subtilis strain IAB/BS03	OrgAS			Yes
Bacillus thuringiensis subsp. Aizawai strain ABTS-1857	OrgAS
Bacillus thuringiensis subsp. Aizawai strain GC-91	OrgAS
Bacillus thuringiensis subsp. Aizawai strains ABTS-1857, GC-91	OrgAS
Bacillus thuringiensis subsp. Israeliensis (serotype H-14) strain AM65-52	OrgAS
Bacillus thuringiensis subsp. Kurstaki strain ABTS 351	OrgAS
Bacillus thuringiensis subsp. Kurstaki strain EG 2348	OrgAS
Bacillus thuringiensis subsp. Kurstaki strain PB 54	OrgAS
Bacillus thuringiensis subsp. Kurstaki strain SA 11	OrgAS
Bacillus thuringiensis subsp. Kurstaki strain SA 12	OrgAS
Bacillus thuringiensis subsp. Kurstaki strains ABTS 351, PB 54, SA 11, SA12 and EG 2348	OrgAS
Beauveria bassiana 203	OrgAS
Beauveria bassiana IMI389521	OrgAS
Beauveria bassiana PPRI 5339	OrgAS
Beauveria bassiana strain 147	OrgAS
Beauveria bassiana strain ATCC 74040	OrgAS
Beauveria bassiana strain GHA	OrgAS
Beauveria bassiana strain NPP111B005	OrgAS
Beauveria bassiana strains ATCC 74040 and GHA	OrgAS
Candida oleophila strain O	OrgAS
Clonostachys rosea strain J1446 (Gliocladium catenulatum strain J1446)	OrgAS			Yes
Coniothyrium minitans Strain CON/M/91-08 (DSM 9660)	OrgAS			Yes
Cydia pomonella Granulovirus (CpGV)	OrgAS
Helicoverpa armigera nucleopolyhedrovirus (HearNPV)	OrgAS
Isaria fumosorosea Apopka strain 97 (formely Paecilomyces fumosoroseus)	OrgAS			Yes
Metarhizium brunneum strain Ma 43 (formerly Metarhizium anisopliae var anisopliae)	OrgAS			Yes
Metschnikowia fructicola strain NRRL Y-27328	OrgAS
Mild Pepino Mosaic Virus isolate VC 1	OrgAS			Yes
Mild Pepino Mosaic Virus isolate VX 1	OrgAS			Yes
Paecilomyces fumosoroseus strain Fe9901	OrgAS
Pasteuria nishizawae Pn1	OrgAS			Yes
Pepino mosaic virus (PepMV) Chilean (CH2) strain, mild isolate Abp2 (PEPMVO)	OrgAS			Yes
Pepino mosaic virus (PepMV) European (EU) strain, mild isolate Abp1 (PEPMVO)	OrgAS			Yes
Pepino mosaic virus strain CH2 isolate 1906	OrgAS			Yes
Phlebiopsis gigantea strain FOC PG 410.3	OrgAS			Yes
Phlebiopsis gigantea strain VRA 1835	OrgAS			Yes
Phlebiopsis gigantea strain VRA 1984	OrgAS			Yes
Pseudomonas chlororaphis strain MA342	OrgAS
Pseudomonas sp. Strain DSMZ 13134	OrgAS
Purpureocillium lilacinum PL 11	OrgAS			Yes
Purpureocillium lilacinum strain 251 (former Paecilomyces lilacinus strain 251)	OrgAS
Pythium oligandrum M1	OrgAS
Saccharomyces cerevisiae strain LAS02	OrgAS			Yes
Spodoptera exigua multicapsid nucleopolyhedrovirus (SeMNPV)	OrgAS			Yes
Spodoptera littoralis nucleopolyhedrovirus (SpliNPV)	OrgAS
Streptomyces K61 (formerly S. griseoviridis)	OrgAS
Streptomyces lydicus WYEC 108	OrgAS
Trichoderma afroharzianum strain T-22 (Formerly Trichoderma harzianum strain T-22)	OrgAS
Trichoderma asperellum (formerly T. harzianum) strain ICC012	OrgAS
Trichoderma asperellum (formerly T. harzianum) strain T25	OrgAS
Trichoderma asperellum (formerly T. harzianum) strain TV1	OrgAS
Trichoderma asperellum (formerly T. harzianum) strains ICC012, T25 and TV1	OrgAS
Trichoderma asperellum strain T34	OrgAS
Trichoderma atrobrunneum (formerly Trichoderma harzianum) strain ITEM 908	OrgAS
Trichoderma atroviride (formerly T. harzianum) strain IMI 206040	OrgAS
Trichoderma atroviride (formerly T. harzianum) strain T11	OrgAS
Trichoderma atroviride (formerly T. harzianum) strain T11 and IMI 206040	OrgAS
Trichoderma atroviride strain I-1237	OrgAS
Trichoderma atroviride strain SC1	OrgAS			Yes
Trichoderma gamsii (formerly T. viride) strain ICC080	OrgAS
Trichoderma harzianum strains T-22 and ITEM 908	OrgAS
Verticillium albo-atrum (formerly Verticillium dahliae) strain WCS850	OrgAS			Yes
Zucchini yellow mosaic virus - weak strain	OrgAS
1-Decanol	ConvAS
1-Naphthylacetamide (1-NAD)	ConvAS
1-Naphthylacetic acid (1-NAA)	ConvAS
2,4-D	ConvAS
2,4-DB	ConvAS
2,5-Dichlorobenzoic acid methylester	ConvAS
6-Benzyladenine	ConvAS
8-Hydroxyquinoline incl. oxyquinoleine	ConvAS	toxic for reproduction 1A / 1B
Abamectin (aka avermectin)	ConvAS
ABE-IT 56	ConvAS			Yes
Acequinocyl	ConvAS
Acetamiprid	ConvAS
Acetic acid	ConvAS
Acibenzolar-S-methyl (benzothiadiazole)	ConvAS
Aclonifen	ConvAS	two PBT criteria
Aluminium ammonium sulphate	ConvAS
Aluminium phosphide	ConvAS
Ametoctradin	ConvAS
Amidosulfuron	ConvAS
Aminopyralid	ConvAS
Amisulbrom	ConvAS
Aqueous extract from the germinated seeds of sweet Lupinus albus	ConvAS			Yes
Azoxystrobin	ConvAS
Beflubutamid	ConvAS
Benalaxyl-M	ConvAS
Benfluralin	ConvAS
Bensulfuron	ConvAS
Bentazone	ConvAS
Benthiavalicarb	ConvAS
Benzovindiflupyr	ConvAS	two PBT criteria
Bifenazate	ConvAS
Bifenox	ConvAS
Bixafen	ConvAS
Blood meal	ConvAS			Yes
Boscalid (formerly nicobifen)	ConvAS
Bromuconazole	ConvAS	two PBT criteria
Bupirimate	ConvAS
Buprofezin	ConvAS
Calcium carbide	ConvAS
Calcium carbonate	ConvAS			Yes
Captan	ConvAS
Carfentrazone-ethyl	ConvAS
Chlorantraniliprole	ConvAS
Chlormequat	ConvAS
Chlorotoluron	ConvAS	endocrine disrupting properties, two PBT criteria
Chromafenozide	ConvAS
Clayed charcoal	ConvAS		Yes
Clethodim	ConvAS
Clodinafop	ConvAS
Clofentezine	ConvAS
Clomazone	ConvAS
Clopyralid	ConvAS
Cyantraniliprole	ConvAS
Cyazofamid	ConvAS
Cycloxydim	ConvAS
Cyflufenamid	ConvAS
Cyflumetofen	ConvAS
Cyhalofop-butyl	ConvAS
Cymoxanil	ConvAS
Cypermethrin	ConvAS	non-active isomers
Cyprodinil	ConvAS	two PBT criteria
Daminozide	ConvAS
Dazomet	ConvAS
Deltamethrin	ConvAS
Dicamba	ConvAS
Dichlorprop-P	ConvAS
Diclofop	ConvAS	low ADI / ARfD / AOEL
Difenoconazole	ConvAS	two PBT criteria
Diflufenican	ConvAS	two PBT criteria
Dimethachlor	ConvAS
Dimethenamid-P	ConvAS
Dimethomorph	ConvAS
Dimoxystrobin	ConvAS	endocrine disrupting properties, low ADI / ARfD / AOEL, two PBT criteria
Disodium phosphonate	ConvAS
Dithianon	ConvAS
Dodemorph	ConvAS
Dodine	ConvAS
Emamectin	ConvAS	low ADI / ARfD / AOEL
Esfenvalerate	ConvAS	two PBT criteria
Ethephon	ConvAS
Ethofumesate	ConvAS
Etofenprox	ConvAS	two PBT criteria
Etoxazole	ConvAS	two PBT criteria
Fat distillation residues	ConvAS
Fenazaquin	ConvAS
Fenhexamid	ConvAS
Fenoxaprop-P	ConvAS
Fenpicoxamid (formerly: Lyserphenvalpyr)	ConvAS
Fenpropidin	ConvAS
Fenpyrazamine	ConvAS
Fenpyroximate	ConvAS
Ferric pyrophosphate	ConvAS			Yes
Flazasulfuron	ConvAS
Flonicamid (IKI-220)	ConvAS
Florasulam	ConvAS
Florpyrauxifen-benzyl	ConvAS
Fluazifop-P	ConvAS
Fluazinam	ConvAS
Flubendiamide	ConvAS
Fludioxonil	ConvAS	two PBT criteria
Flufenacet (formerly fluthiamide)	ConvAS	two PBT criteria
Flumetralin	ConvAS	two PBT criteria
Flumioxazin	ConvAS
Fluometuron	ConvAS	low ADI / ARfD / AOEL
Fluopicolide	ConvAS	two PBT criteria
Fluopyram	ConvAS
Fluoxastrobin	ConvAS
Flupyradifurone	ConvAS
Flurochloridone	ConvAS	toxic for reproduction 1A / 1B
Fluroxypyr	ConvAS
Flutianil	ConvAS
Flutolanil	ConvAS
Fluxapyroxad	ConvAS
Folpet	ConvAS
Foramsulfuron	ConvAS
Forchlorfenuron	ConvAS
Formetanate	ConvAS
Fosetyl	ConvAS
Fosthiazate	ConvAS
Gamma-cyhalothrin	ConvAS	low ADI / ARfD / AOEL
Gibberellic acid	ConvAS
Gibberellins	ConvAS
Glyphosate	ConvAS
Halauxifen-methyl	ConvAS
Halosulfuron - methyl	ConvAS	toxic for reproduction 1A / 1B
Heptamaloxyloglucan	ConvAS
Hexythiazox	ConvAS
Hymexazol	ConvAS
Imazalil (aka enilconazole)	ConvAS
Imazamox	ConvAS	two PBT criteria
Indolylbutyric acid	ConvAS
Iodosulfuron	ConvAS
Ipconazole	ConvAS	toxic for reproduction 1A / 1B
Iprovalicarb	ConvAS
Iron sulphate	ConvAS
Isofetamid	ConvAS
Isoxaben	ConvAS
Isoxaflutole	ConvAS
Kresoxim-methyl	ConvAS
L-Ascorbic acid	ConvAS
lambda-Cyhalothrin	ConvAS	low ADI / ARfD / AOEL, two PBT criteria
Lenacil	ConvAS	two PBT criteria
Magnesium phosphide	ConvAS
Malathion	ConvAS
Maleic hydrazide	ConvAS
Mandestrobin	ConvAS
Mandipropamid	ConvAS
MCPA	ConvAS
MCPB	ConvAS
Mecoprop-P	ConvAS
Mefentrifluconazole	ConvAS
Mepanipyrim	ConvAS
Mepiquat	ConvAS
Meptyldinocap	ConvAS
Mesosulfuron	ConvAS
Mesotrione	ConvAS
Metaflumizone	ConvAS
Metalaxyl	ConvAS	non-active isomers
Metalaxyl-M	ConvAS
Metaldehyde	ConvAS
Metam (incl. -potassium and -sodium)	ConvAS	low ADI / ARfD / AOEL
Metamitron	ConvAS
Metazachlor	ConvAS
Metconazole	ConvAS	two PBT criteria
Methoxyfenozide	ConvAS	two PBT criteria
Metiram	ConvAS
Metobromuron	ConvAS
Metrafenone	ConvAS
Metribuzin	ConvAS	two PBT criteria
Metsulfuron-methyl	ConvAS	two PBT criteria
Milbemectin	ConvAS
Napropamide	ConvAS
Nicosulfuron	ConvAS	two PBT criteria
Oxamyl	ConvAS	low ADI / ARfD / AOEL
Oxathiapiprolin	ConvAS
Oxyfluorfen	ConvAS	two PBT criteria
Paclobutrazol	ConvAS	two PBT criteria
Penconazole	ConvAS
Pendimethalin	ConvAS	two PBT criteria
Penflufen	ConvAS
Penoxsulam	ConvAS
Penthiopyrad	ConvAS
Pethoxamid	ConvAS
Phenmedipham	ConvAS
Picloram	ConvAS
Picolinafen	ConvAS
Pinoxaden	ConvAS
Pirimicarb	ConvAS	two PBT criteria
Potassium phosphonates (formerly potassium phosphite)	ConvAS
Prohexadione	ConvAS
Propamocarb	ConvAS
Propaquizafop	ConvAS
Propoxycarbazone	ConvAS
Propyzamide	ConvAS	two PBT criteria
Proquinazid	ConvAS
Prosulfocarb	ConvAS
Prosulfuron	ConvAS	two PBT criteria
Prothioconazole	ConvAS
Pyraclostrobin	ConvAS
Pyraflufen-ethyl	ConvAS
Pyridaben	ConvAS
Pyridalyl	ConvAS
Pyridate	ConvAS
Pyrimethanil	ConvAS
Pyriofenone	ConvAS
Pyriproxyfen	ConvAS
Pyroxsulam	ConvAS
Quinmerac	ConvAS
Quizalofop-P	ConvAS
Quizalofop-P-ethyl	ConvAS
Quizalofop-P-tefuryl	ConvAS	toxic for reproduction 1A / 1B
Repellents by smell of animal or plant origin/ fish oil	ConvAS
Rimsulfuron (aka renriduron)	ConvAS
S-abscisic acid	ConvAS
S-Metolachlor	ConvAS
Sedaxane	ConvAS
Silthiofam	ConvAS
Sintofen (aka Cintofen)	ConvAS
Sodium 5-nitroguaiacolate	ConvAS
Sodium o-nitrophenolate	ConvAS
Sodium p-nitrophenolate	ConvAS
Spinetoram	ConvAS
Spiromesifen	ConvAS
Spirotetramat	ConvAS
Spiroxamine	ConvAS
Sulcotrione	ConvAS	low ADI / ARfD / AOEL
Sulfosulfuron	ConvAS
Sulfoxaflor	ConvAS
Talc E553B	ConvAS		Yes
tau-Fluvalinate	ConvAS
Tebuconazole	ConvAS	two PBT criteria
Tebufenozide	ConvAS
Tebufenpyrad	ConvAS	two PBT criteria
Tefluthrin	ConvAS
Tembotrione	ConvAS	low ADI / ARfD / AOEL
Terbuthylazine	ConvAS
Terpenoid blend QRD-460	ConvAS
Tetraconazole	ConvAS
Thiabendazole	ConvAS
Thiencarbazone-methyl	ConvAS
Thifensulfuron-methyl	ConvAS
Tolclofos-methyl	ConvAS
Tri-allate	ConvAS	two PBT criteria
Tribenuron (aka metometuron)	ConvAS
Triclopyr	ConvAS
Trifloxystrobin	ConvAS
Triflusulfuron	ConvAS
Trinexapac (aka cimetacarb ethyl)	ConvAS
Triticonazole	ConvAS
Tritosulfuron	ConvAS
Urea	ConvAS
Valifenalate (formerly Valiphenal)	ConvAS
Zinc phosphide	ConvAS
Ziram	ConvAS	two PBT criteria
Zoxamide	ConvAS
