# Supplementary material for: Toxicological Comparison of Pesticide Active Substances Approved for Conventional vs. Organic Agriculture in Europe
Source: Toxics. 2022 Dec 2;10(12):753. doi: 10.3390/toxics10120753 (PMC9783316; doi:10.3390/toxics10120753)
Supplement: Supplementary file 1 [file toxics-10-00753-s001.zip › _Supplementary_Table S3_All active substances with GHS hazard statements.xlsx]

## Sheet: Suppl.Tab.S3
Substance	Classification into organic and conventional production	Hazard Statements – Classification (Reg. 1272/2008)
Allium cepa L. bulb extract	OrgAS
Aluminium silicate (aka kaolin)	OrgAS
Azadirachtin (Margosa extract)	OrgAS
Beer	OrgAS
Bordeaux mixture	OrgAS
Calcium hydroxide	OrgAS
Capric acid (CAS 334-48-5)	OrgAS
Caprylic acid (CAS 124-07-2)	OrgAS
Cerevisane	OrgAS
Chitosan hydrochloride	OrgAS
Copper hydroxide	OrgAS
Copper oxide	OrgAS
Copper oxychloride	OrgAS
COS-OGA	OrgAS
Cow Milk	OrgAS
Equisetum arvense L.	OrgAS
Eugenol	OrgAS
Extract from tea tree	OrgAS
Ferric phosphate	OrgAS
Fructose	OrgAS
Garlic extract	OrgAS
Geraniol	OrgAS
Hydrogen peroxide	OrgAS	Acute Tox. 4 - H302, Acute Tox. 4 - H332, Ox. Liq. 1 - H271, Skin Corr. 1A - H314
Hydrolysed proteins	OrgAS
Kieselgur (diatomaceous earth)	OrgAS
L-cysteine	OrgAS
Laminarin	OrgAS
Lauric acid (CAS 143-07-7)	OrgAS
Lecithins	OrgAS
Lime sulphur (calcium polysulphid)	OrgAS
Maltodextrin	OrgAS
Methyl decanoate (CAS 110-42-9)	OrgAS
Methyl octanoate (CAS 111-11-5)	OrgAS
Mustard seeds powder	OrgAS
Oleic acid (CAS 112-80-1)	OrgAS
Onion oil	OrgAS
Orange oil	OrgAS
Paraffin oil/(CAS 64742-46-7)	OrgAS
Paraffin oil/(CAS 72623-86-0)	OrgAS
Paraffin oil/(CAS 8042-47-5)	OrgAS
Paraffin oil/(CAS 97862-82-3)	OrgAS
Pelargonic acid (CAS 112-05-0)	OrgAS
Plant oils / Rape seed oil	OrgAS
Potassium hydrogen carbonate	OrgAS
Pyrethrins	OrgAS	Acute Tox. 4 - H302, Acute Tox. 4 - H312, Acute Tox. 4 - H332, Aquatic Acute 1 - H400, Aquatic Chronic 1 - H410
Quartz sand	OrgAS
Repellents by smell of animal or plant origin/ sheep fat	OrgAS
Salix spp. cortex	OrgAS
Sodium chloride	OrgAS
Sodium hydrogen carbonate (low risk active substance)	OrgAS
Spinosad	OrgAS	Aquatic Acute 1 - H400, Aquatic Chronic 1 - H410
Sucrose	OrgAS
Sulphur	OrgAS	Skin Irrit. 2 - H315
Sunflower oil	OrgAS
Thymol	OrgAS
Tribasic copper sulfate	OrgAS
Urtica spp.	OrgAS
Vinegar	OrgAS
Whey	OrgAS
Adoxophyes orana GV strain BV-0001	OrgAS
Akanthomyces muscarius Ve6 (formerly Lecanicillium muscarium strain Ve6)	OrgAS
Ampelomyces quisqualis strain AQ10	OrgAS
Aureobasidium pullulans (strains DSM 14940 and DSM 14941)	OrgAS
Bacillus amyloliquefaciens (formerly subtilis) str. QST 713	OrgAS
Bacillus amyloliquefaciens AH2	OrgAS
Bacillus amyloliquefaciens IT-45	OrgAS
Bacillus amyloliquefaciens MBI 600	OrgAS
Bacillus amyloliquefaciens strain FZB24	OrgAS
Bacillus amyloliquefaciens subsp. plantarum D747	OrgAS
Bacillus firmus I-1582	OrgAS
Bacillus pumilus QST 2808	OrgAS
Bacillus subtilis strain IAB/BS03	OrgAS
Bacillus thuringiensis subsp. Aizawai strain ABTS-1857	OrgAS
Bacillus thuringiensis subsp. Aizawai strain GC-91	OrgAS
Bacillus thuringiensis subsp. Aizawai strains ABTS-1857, GC-91	OrgAS
Bacillus thuringiensis subsp. Israeliensis (serotype H-14) strain AM65-52	OrgAS
Bacillus thuringiensis subsp. Kurstaki strain ABTS 351	OrgAS
Bacillus thuringiensis subsp. Kurstaki strain EG 2348	OrgAS
Bacillus thuringiensis subsp. Kurstaki strain PB 54	OrgAS
Bacillus thuringiensis subsp. Kurstaki strain SA 11	OrgAS
Bacillus thuringiensis subsp. Kurstaki strain SA 12	OrgAS
Bacillus thuringiensis subsp. Kurstaki strains ABTS 351, PB 54, SA 11, SA12 and EG 2348	OrgAS
Beauveria bassiana 203	OrgAS
Beauveria bassiana IMI389521	OrgAS
Beauveria bassiana PPRI 5339	OrgAS
Beauveria bassiana strain 147	OrgAS
Beauveria bassiana strain ATCC 74040	OrgAS
Beauveria bassiana strain GHA	OrgAS
Beauveria bassiana strain NPP111B005	OrgAS
Beauveria bassiana strains ATCC 74040 and GHA	OrgAS
Candida oleophila strain O	OrgAS
Clonostachys rosea strain J1446 (Gliocladium catenulatum strain J1446)	OrgAS
Coniothyrium minitans Strain CON/M/91-08 (DSM 9660)	OrgAS
Cydia pomonella Granulovirus (CpGV)	OrgAS
Helicoverpa armigera nucleopolyhedrovirus (HearNPV)	OrgAS
Isaria fumosorosea Apopka strain 97 (formely Paecilomyces fumosoroseus)	OrgAS
Metarhizium brunneum strain Ma 43 (formerly Metarhizium anisopliae var anisopliae)	OrgAS
Metschnikowia fructicola strain NRRL Y-27328	OrgAS
Mild Pepino Mosaic Virus isolate VC 1	OrgAS
Mild Pepino Mosaic Virus isolate VX 1	OrgAS
Paecilomyces fumosoroseus strain Fe9901	OrgAS
Pasteuria nishizawae Pn1	OrgAS
Pepino mosaic virus (PepMV) Chilean (CH2) strain, mild isolate Abp2 (PEPMVO)	OrgAS
Pepino mosaic virus (PepMV) European (EU) strain, mild isolate Abp1 (PEPMVO)	OrgAS
Pepino mosaic virus strain CH2 isolate 1906	OrgAS
Phlebiopsis gigantea strain FOC PG 410.3	OrgAS
Phlebiopsis gigantea strain VRA 1835	OrgAS
Phlebiopsis gigantea strain VRA 1984	OrgAS
Pseudomonas chlororaphis strain MA342	OrgAS
Pseudomonas sp. Strain DSMZ 13134	OrgAS
Purpureocillium lilacinum PL 11	OrgAS
Purpureocillium lilacinum strain 251 (former Paecilomyces lilacinus strain 251)	OrgAS
Pythium oligandrum M1	OrgAS
Saccharomyces cerevisiae strain LAS02	OrgAS
Spodoptera exigua multicapsid nucleopolyhedrovirus (SeMNPV)	OrgAS
Spodoptera littoralis nucleopolyhedrovirus (SpliNPV)	OrgAS
Streptomyces K61 (formerly S. griseoviridis)	OrgAS
Streptomyces lydicus WYEC 108	OrgAS
Trichoderma afroharzianum strain T-22 (Formerly Trichoderma harzianum strain T-22)	OrgAS
Trichoderma asperellum (formerly T. harzianum) strain ICC012	OrgAS
Trichoderma asperellum (formerly T. harzianum) strain T25	OrgAS
Trichoderma asperellum (formerly T. harzianum) strain TV1	OrgAS
Trichoderma asperellum (formerly T. harzianum) strains ICC012, T25 and TV1	OrgAS
Trichoderma asperellum strain T34	OrgAS
Trichoderma atrobrunneum (formerly Trichoderma harzianum) strain ITEM 908	OrgAS
Trichoderma atroviride (formerly T. harzianum) strain IMI 206040	OrgAS
Trichoderma atroviride (formerly T. harzianum) strain T11	OrgAS
Trichoderma atroviride (formerly T. harzianum) strain T11 and IMI 206040	OrgAS
Trichoderma atroviride strain I-1237	OrgAS
Trichoderma atroviride strain SC1	OrgAS
Trichoderma gamsii (formerly T. viride) strain ICC080	OrgAS
Trichoderma harzianum strains T-22 and ITEM 908	OrgAS
Verticillium albo-atrum (formerly Verticillium dahliae) strain WCS850	OrgAS
Zucchini yellow mosaic virus - weak strain	OrgAS
1-Decanol	ConvAS
1-Naphthylacetamide (1-NAD)	ConvAS
1-Naphthylacetic acid (1-NAA)	ConvAS
2,4-D	ConvAS	Acute Tox. 4 - H302, Aquatic Chronic 3 - H412, Eye Dam. 1 - H318, STOT SE 3 - H335, Skin Sens. 1 - H317
2,4-DB	ConvAS	Acute Tox. 4 - H302, Aquatic Chronic 2 - H411
2,5-Dichlorobenzoic acid methylester	ConvAS
24-Epibrassinolide	ConvAS
6-Benzyladenine	ConvAS
8-Hydroxyquinoline incl. oxyquinoleine	ConvAS	Acute Tox. 3 - H301, Aquatic Acute 1 - H400, Aquatic Chronic 1 - H410, Eye Dam. 1 - H318, Repr. 1B - H360D, Skin Sens. 1 - H317
Abamectin (aka avermectin)	ConvAS	Acute Tox. 1 - H330, Acute Tox. 2 - H300, Aquatic Acute 1 - H400, Aquatic Chronic 1 - H410, Repr. 2 - H361d, STOT RE 1 - H372
ABE-IT 56	ConvAS
Acequinocyl	ConvAS	Aquatic Acute 1 - H400, Aquatic Chronic 1 - H410, STOT RE 2 - H373, STOT SE 1 - H370, Skin Sens. 1 - H317
Acetamiprid	ConvAS	Acute Tox. 4 - H302, Aquatic Chronic 3 - H412
Acetic acid	ConvAS	Flam. Liq. 3 - H226, Skin Corr. 1A - H314
Acibenzolar-S-methyl (benzothiadiazole)	ConvAS	Aquatic Acute 1 - H400, Aquatic Chronic 1 - H410, Eye Irrit. 2 - H319, STOT SE 3 - H335, Skin Irrit. 2 - H315, Skin Sens. 1 - H317
Aclonifen	ConvAS	Aquatic Acute 1 - H400, Aquatic Chronic 1 - H410, Carc. 2 - H351, Skin Sens. 1A - H317
Aluminium ammonium sulphate	ConvAS
Aluminium phosphide	ConvAS	Acute Tox. 1 - H330, Acute Tox. 2 - H300, Acute Tox. 3 - H311, Aquatic Acute 1 - H400, Water-react. 1 - H260
Ametoctradin	ConvAS
Amidosulfuron	ConvAS	Aquatic Acute 1 - H400, Aquatic Chronic 1 - H410
Aminopyralid	ConvAS
Amisulbrom	ConvAS	Aquatic Acute 1 - H400, Aquatic Chronic 1 - H410, Carc. 2 - H351, Eye Irrit. 2 - H319
Aqueous extract from the germinated seeds of sweet Lupinus albus	ConvAS
Azoxystrobin	ConvAS	Acute Tox. 3 - H331, Aquatic Acute 1 - H400, Aquatic Chronic 1 - H410
Beflubutamid	ConvAS	Aquatic Acute 1 - H400, Aquatic Chronic 1 - H410
Benalaxyl-M	ConvAS
Benfluralin	ConvAS
Bensulfuron	ConvAS
Bentazone	ConvAS	Acute Tox. 4 - H302, Aquatic Chronic 3 - H412, Eye Irrit. 2 - H319, Skin Sens. 1 - H317
Benthiavalicarb	ConvAS
Benzovindiflupyr	ConvAS	Acute Tox. 3 - H301, Acute Tox. 3 - H331, Aquatic Acute 1 - H400, Aquatic Chronic 1 - H410
Bifenazate	ConvAS	Aquatic Acute 1 - H400, Aquatic Chronic 1 - H410, STOT RE 2 - H373, Skin Sens. 1 - H317
Bifenox	ConvAS
Bixafen	ConvAS
Blood meal	ConvAS
Boscalid (formerly nicobifen)	ConvAS
Bromuconazole	ConvAS
Bupirimate	ConvAS	Aquatic Chronic 1 - H410, Carc. 2 - H351, Skin Sens. 1B - H317
Buprofezin	ConvAS
Calcium carbide	ConvAS	Water-react. 1 - H260
Calcium carbonate	ConvAS
Captan	ConvAS	Acute Tox. 3 - H331, Aquatic Acute 1 - H400, Carc. 2 - H351, Eye Dam. 1 - H318, Skin Sens. 1 - H317
Carfentrazone-ethyl	ConvAS	Aquatic Acute 1 - H400, Aquatic Chronic 1 - H410
Chlorantraniliprole	ConvAS
Chlormequat	ConvAS	Acute Tox. 4 - H302, Acute Tox. 4 - H312
Chlorotoluron	ConvAS	Aquatic Acute 1 - H400, Aquatic Chronic 1 - H410, Carc. 2 - H351, Repr. 2 - H361d
Chromafenozide	ConvAS
Clayed charcoal	ConvAS
Clethodim	ConvAS	Acute Tox. 4 - H302, Aquatic Chronic 3 - H412, Skin Sens. 1 - H317
Clodinafop	ConvAS	Acute Tox. 4 - H302, Aquatic Acute 1 - H400, Aquatic Chronic 1 - H410, STOT RE 2 - H373, Skin Sens. 1 - H317
Clofentezine	ConvAS
Clomazone	ConvAS
Clopyralid	ConvAS	Eye Dam. 1 - H318
Cyantraniliprole	ConvAS
Cyazofamid	ConvAS	Aquatic Acute 1 - H400, Aquatic Chronic 1 - H410
Cycloxydim	ConvAS	Repr. 2 - H361d
Cyflufenamid	ConvAS
Cyflumetofen	ConvAS
Cyhalofop-butyl	ConvAS
Cymoxanil	ConvAS	Acute Tox. 4 - H302, Aquatic Acute 1 - H400, Aquatic Chronic 1 - H410, Repr. 2 - H361fd, STOT RE 2 - H373, Skin Sens. 1 - H317
Cypermethrin	ConvAS	Acute Tox. 4 - H302, Acute Tox. 4 - H332, Aquatic Acute 1 - H400, Aquatic Chronic 1 - H410, STOT SE 3 - H335
Cyprodinil	ConvAS	Aquatic Acute 1 - H400, Aquatic Chronic 1 - H410, Skin Sens. 1 - H317
Daminozide	ConvAS
Dazomet	ConvAS	Acute Tox. 4 - H302, Aquatic Acute 1 - H400, Aquatic Chronic 1 - H410, Eye Irrit. 2 - H319
Deltamethrin	ConvAS	Acute Tox. 3 - H301, Acute Tox. 3 - H331, Aquatic Acute 1 - H400, Aquatic Chronic 1 - H410
Dicamba	ConvAS	Acute Tox. 4 - H302, Aquatic Chronic 3 - H412, Eye Dam. 1 - H318
Dichlorprop-P	ConvAS	Acute Tox. 4 - H302, Eye Dam. 1 - H318, Skin Irrit. 2 - H315, Skin Sens. 1 - H317
Diclofop	ConvAS
Difenoconazole	ConvAS
Diflufenican	ConvAS	Aquatic Chronic 3 - H412
Dimethachlor	ConvAS	Acute Tox. 4 - H302, Aquatic Acute 1 - H400, Aquatic Chronic 1 - H410, Skin Sens. 1 - H317
Dimethenamid-P	ConvAS	Acute Tox. 4 - H302, Aquatic Acute 1 - H400, Aquatic Chronic 1 - H410, Skin Sens. 1 - H317
Dimethomorph	ConvAS	Aquatic Chronic 2 - H411
Dimoxystrobin	ConvAS	Acute Tox. 4 - H332, Aquatic Acute 1 - H400, Aquatic Chronic 1 - H410, Carc. 2 - H351, Repr. 2 - H361d
Disodium phosphonate	ConvAS
Dithianon	ConvAS	Acute Tox. 4 - H302, Aquatic Acute 1 - H400, Aquatic Chronic 1 - H410
Dodemorph	ConvAS	Aquatic Acute 1 - H400, Aquatic Chronic 1 - H410, Repr. 2 - H361d, STOT RE 2 - H373, Skin Corr. 1C - H314, Skin Sens. 1A - H317
Dodine	ConvAS	Acute Tox. 4 - H302, Aquatic Acute 1 - H400, Aquatic Chronic 1 - H410, Eye Irrit. 2 - H319, Skin Irrit. 2 - H315
Emamectin	ConvAS
Esfenvalerate	ConvAS	Acute Tox. 3 - H301, Acute Tox. 3 - H331, Aquatic Acute 1 - H400, Aquatic Chronic 1 - H410, Skin Sens. 1 - H317
Ethephon	ConvAS	Acute Tox. 3 - H311, Acute Tox. 4 - H302, Acute Tox. 4 - H332, Aquatic Chronic 2 - H411, Skin Corr. 1C - H314
Ethofumesate	ConvAS	Aquatic Chronic 2 - H411
Etofenprox	ConvAS	Aquatic Acute 1 - H400, Aquatic Chronic 1 - H410, Lact. - H362
Etoxazole	ConvAS	Aquatic Acute 1 - H400, Aquatic Chronic 1 - H410
Fat distillation residues	ConvAS
Fenazaquin	ConvAS	Acute Tox. 3 - H301, Acute Tox. 4 - H332, Aquatic Acute 1 - H400, Aquatic Chronic 1 - H410
Fenhexamid	ConvAS	Aquatic Chronic 2 - H411
Fenoxaprop-P	ConvAS	Aquatic Acute 1 - H400, Aquatic Chronic 1 - H410, STOT RE 2 - H373, Skin Sens. 1 - H317
Fenpicoxamid (formerly: Lyserphenvalpyr)	ConvAS
Fenpropidin	ConvAS
Fenpyrazamine	ConvAS	Aquatic Acute 1 - H400, Aquatic Chronic 1 - H410
Fenpyroximate	ConvAS	Acute Tox. 2 - H330, Acute Tox. 3 - H301, Aquatic Acute 1 - H400, Aquatic Chronic 1 - H410, Skin Sens. 1B - H317
Ferric pyrophosphate	ConvAS
Flazasulfuron	ConvAS	Aquatic Acute 1 - H400, Aquatic Chronic 1 - H410
Flonicamid (IKI-220)	ConvAS	Acute Tox. 4 - H302
Florasulam	ConvAS	Aquatic Acute 1 - H400, Aquatic Chronic 1 - H410
Florpyrauxifen-benzyl	ConvAS
Fluazifop-P	ConvAS	Aquatic Acute 1 - H400, Aquatic Chronic 1 - H410, Repr. 2 - H361d
Fluazinam	ConvAS	Acute Tox. 4 - H332, Aquatic Acute 1 - H400, Aquatic Chronic 1 - H410, Eye Dam. 1 - H318, Repr. 2 - H361d, Skin Sens. 1A - H317
Flubendiamide	ConvAS
Fludioxonil	ConvAS
Flufenacet (formerly fluthiamide)	ConvAS	Acute Tox. 4 - H302, Aquatic Acute 1 - H400, Aquatic Chronic 1 - H410, STOT RE 2 - H373, Skin Sens. 1 - H317
Flumetralin	ConvAS	Aquatic Acute 1 - H400, Aquatic Chronic 1 - H410, Eye Irrit. 2 - H319, Skin Irrit. 2 - H315, Skin Sens. 1 - H317
Flumioxazin	ConvAS	Aquatic Acute 1 - ---, Aquatic Chronic 1 - H410, Repr. 2 - H361d
Fluometuron	ConvAS
Fluopicolide	ConvAS
Fluopyram	ConvAS	Aquatic Chronic 2 - H411
Fluoxastrobin	ConvAS
Flupyradifurone	ConvAS
Flurochloridone	ConvAS
Fluroxypyr	ConvAS	Aquatic Chronic 3 - H412
Flutianil	ConvAS	Aquatic Chronic 1 - H410
Flutolanil	ConvAS
Fluxapyroxad	ConvAS
Folpet	ConvAS	Acute Tox. 4 - H332, Aquatic Acute 1 - H400, Carc. 2 - H351, Eye Irrit. 2 - H319, Skin Sens. 1 - H317
Foramsulfuron	ConvAS
Forchlorfenuron	ConvAS	Aquatic Chronic 2 - H411, Carc. 2 - H351
Formetanate	ConvAS	Acute Tox. 2 - H300, Acute Tox. 2 - H330, Aquatic Acute 1 - H400, Aquatic Chronic 1 - H410, Skin Sens. 1 - H317
Fosetyl	ConvAS
Fosthiazate	ConvAS	Acute Tox. 3 - H301, Acute Tox. 3 - H331, Acute Tox. 4 - H312, Aquatic Acute 1 - H400, Aquatic Chronic 1 - H410, Skin Sens. 1 - H317
Gamma-cyhalothrin	ConvAS
Gibberellic acid	ConvAS
Gibberellins	ConvAS
Glyphosate	ConvAS	Aquatic Chronic 2 - H411, Eye Dam. 1 - H318
Halauxifen-methyl	ConvAS
Halosulfuron - methyl	ConvAS
Heptamaloxyloglucan	ConvAS
Hexythiazox	ConvAS	Aquatic Acute 1 - H400, Aquatic Chronic 1 - H410
Hymexazol	ConvAS	Acute Tox. 4 - H302, Aquatic Chronic 3 - H412, Eye Dam. 1 - H318
Imazalil (aka enilconazole)	ConvAS	Acute Tox. 3 - H301, Acute Tox. 4 - H332, Aquatic Chronic 1 - H410, Carc. 2 - H351, Eye Dam. 1 - H318
Imazamox	ConvAS	Aquatic Acute 1 - H400, Aquatic Chronic 1 - H410
Indolylbutyric acid	ConvAS
Iodosulfuron	ConvAS	Aquatic Acute 1 - H400, Aquatic Chronic 1 - H410
Ipconazole	ConvAS
Iprovalicarb	ConvAS
Iron sulphate	ConvAS	Acute Tox. 4 - H302, Eye Irrit. 2 - H319, Skin Irrit. 2 - H315
Isofetamid	ConvAS
Isoxaben	ConvAS	Aquatic Chronic 4 - H413
Isoxaflutole	ConvAS	Aquatic Acute 1 - H400, Aquatic Chronic 1 - H410, Repr. 2 - H361d
Kresoxim-methyl	ConvAS	Aquatic Acute 1 - H400, Aquatic Chronic 1 - H410, Carc. 2 - H351
L-Ascorbic acid	ConvAS
lambda-Cyhalothrin	ConvAS	Acute Tox. 2 - H330, Acute Tox. 3 - H301, Acute Tox. 4 - H312, Aquatic Acute 1 - H400, Aquatic Chronic 1 - H410
Lenacil	ConvAS	Aquatic Acute 1 - H400, Aquatic Chronic 1 - H410, Carc. 2 - H351
Magnesium phosphide	ConvAS	Acute Tox. 1 - H330, Acute Tox. 2 - H300, Acute Tox. 3 - H311, Aquatic Acute 1 - H400, Water-react. 1 - H260
Malathion	ConvAS	Acute Tox. 4 - H302, Aquatic Acute 1 - H400, Aquatic Chronic 1 - H410, Skin Sens. 1 - H317
Maleic hydrazide	ConvAS
Mandestrobin	ConvAS
Mandipropamid	ConvAS	Aquatic Acute 1 - H400, Aquatic Chronic 1 - H410
MCPA	ConvAS	Acute Tox. 4 - H302, Aquatic Acute 1 - H400, Aquatic Chronic 1 - H410, Eye Dam. 1 - H318, Skin Irrit. 2 - H315
MCPB	ConvAS	Aquatic Acute 1 - H400, Aquatic Chronic 1 - H410
Mecoprop-P	ConvAS	Acute Tox. 4 - H302, Aquatic Chronic 2 - H411, Eye Dam. 1 - H318
Mefentrifluconazole	ConvAS
Mepanipyrim	ConvAS	Aquatic Acute 1 - H400, Aquatic Chronic 1 - H410, Carc. 2 - H351
Mepiquat	ConvAS
Meptyldinocap	ConvAS
Mesosulfuron	ConvAS
Mesotrione	ConvAS	Aquatic Acute 1 - H400, Aquatic Chronic 1 - H410
Metaflumizone	ConvAS
Metalaxyl	ConvAS	Acute Tox. 4 - H302, Aquatic Chronic 3 - H412, Skin Sens. 1 - H317
Metalaxyl-M	ConvAS	Acute Tox. 4 - H302, Eye Dam. 1 - H318
Metaldehyde	ConvAS
Metam (incl. -potassium and -sodium)	ConvAS	Acute Tox. 4 - H302, Aquatic Acute 1 - H400, Aquatic Chronic 1 - H410, Skin Corr. 1B - H314, Skin Sens. 1 - H317
Metamitron	ConvAS	Acute Tox. 4 - H302, Aquatic Acute 1 - H400
Metazachlor	ConvAS	Aquatic Acute 1 - H400, Aquatic Chronic 1 - H410, Carc. 2 - H351, Skin Sens. 1B - H317
Metconazole	ConvAS	Acute Tox. 4 - H302, Aquatic Chronic 2 - H411, Repr. 2 - H361d
Methoxyfenozide	ConvAS
Metiram	ConvAS
Metobromuron	ConvAS
Metrafenone	ConvAS
Metribuzin	ConvAS	Acute Tox. 4 - H302, Aquatic Acute 1 - H400, Aquatic Chronic 1 - H410
Metsulfuron-methyl	ConvAS	Aquatic Acute 1 - H400, Aquatic Chronic 1 - H410
Milbemectin	ConvAS	Acute Tox. 4 - H302, Acute Tox. 4 - H332, Aquatic Acute 1 - H400, Aquatic Chronic 1 - H410
Napropamide	ConvAS
Nicosulfuron	ConvAS
Oxamyl	ConvAS	Acute Tox. 2 - H300, Acute Tox. 2 - H330, Acute Tox. 4 - H312, Aquatic Chronic 2 - H411
Oxathiapiprolin	ConvAS
Oxyfluorfen	ConvAS
Paclobutrazol	ConvAS
Penconazole	ConvAS	Acute Tox. 4 - H302, Aquatic Acute 1 - H400, Aquatic Chronic 1 - H410, Repr. 2 - H361d
Pendimethalin	ConvAS	Aquatic Acute 1 - H400, Aquatic Chronic 1 - H410, Skin Sens. 1 - H317
Penflufen	ConvAS
Penoxsulam	ConvAS
Penthiopyrad	ConvAS	Aquatic Acute 1 - H400, Aquatic Chronic 1 - H410
Pethoxamid	ConvAS	Acute Tox. 4 - H302, Aquatic Acute 1 - H400, Aquatic Chronic 1 - H410, Skin Sens. 1 - H317
Phenmedipham	ConvAS	Aquatic Acute 1 - H400, Aquatic Chronic 1 - H410
Picloram	ConvAS
Picolinafen	ConvAS
Pinoxaden	ConvAS	Acute Tox. 4 - H302, Acute Tox. 4 - H332, Aquatic Acute 1 - H400, Aquatic Chronic 3 - H412, Eye Irrit. 2 - H319, Repr. 2 - H361d, STOT SE 3 - H335, Skin Sens. 1A - H317
Pirimicarb	ConvAS	Acute Tox. 3 - H301, Acute Tox. 3 - H331, Aquatic Acute 1 - H400, Aquatic Chronic 1 - H410, Carc. 2 - H351, Skin Sens. 1 - H317
Potassium phosphonates (formerly potassium phosphite)	ConvAS
Prohexadione	ConvAS
Propamocarb	ConvAS
Propaquizafop	ConvAS
Propoxycarbazone	ConvAS	Aquatic Acute 1 - H400, Aquatic Chronic 1 - H410
Propyzamide	ConvAS	Aquatic Acute 1 - H400, Aquatic Chronic 1 - H410, Carc. 2 - H351
Proquinazid	ConvAS	Aquatic Acute 1 - H400, Aquatic Chronic 1 - H410, Carc. 2 - H351
Prosulfocarb	ConvAS	Acute Tox. 4 - H302, Aquatic Chronic 2 - H411, Skin Sens. 1 - H317
Prosulfuron	ConvAS	Acute Tox. 4 - H302, Aquatic Acute 1 - H400, Aquatic Chronic 1 - H410
Prothioconazole	ConvAS
Pyraclostrobin	ConvAS	Acute Tox. 3 - H331, Aquatic Acute 1 - H400, Aquatic Chronic 1 - H410, Skin Irrit. 2 - H315
Pyraflufen-ethyl	ConvAS	Aquatic Acute 1 - H400, Aquatic Chronic 1 - H410
Pyridaben	ConvAS	Acute Tox. 3 - H301, Acute Tox. 3 - H331, Aquatic Acute 1 - H400, Aquatic Chronic 1 - H410
Pyridalyl	ConvAS
Pyridate	ConvAS	Aquatic Acute 1 - H400, Aquatic Chronic 1 - H410, Skin Irrit. 2 - H315, Skin Sens. 1 - H317
Pyrimethanil	ConvAS	Aquatic Chronic 2 - H411
Pyriofenone	ConvAS
Pyriproxyfen	ConvAS
Pyroxsulam	ConvAS	Aquatic Acute 1 - H400, Aquatic Chronic 1 - H410, Skin Sens. 1 - H317
Quinmerac	ConvAS
Quizalofop-P	ConvAS
Quizalofop-P-ethyl	ConvAS
Quizalofop-P-tefuryl	ConvAS	Acute Tox. 4 - H302, Aquatic Acute 1 - H400, Aquatic Chronic 1 - H410, Carc. 2 - H351, Repr. 2 - H361fd, STOT RE 2 - H373
Repellents by smell of animal or plant origin/ fish oil	ConvAS
Rimsulfuron (aka renriduron)	ConvAS
S-abscisic acid	ConvAS
S-Metolachlor	ConvAS	Aquatic Acute 1 - H400, Aquatic Chronic 1 - H410, Skin Sens. 1 - H317
Sedaxane	ConvAS
Silthiofam	ConvAS
Sintofen (aka Cintofen)	ConvAS
Sodium 5-nitroguaiacolate	ConvAS
Sodium o-nitrophenolate	ConvAS
Sodium p-nitrophenolate	ConvAS
Spinetoram	ConvAS
Spiromesifen	ConvAS
Spirotetramat	ConvAS	Aquatic Acute 1 - H400, Aquatic Chronic 1 - H410, Eye Irrit. 2 - H319, Repr. 2 - H361fd, STOT SE 3 - H335, Skin Sens. 1A - H317
Spiroxamine	ConvAS	Acute Tox. 4 - H302, Acute Tox. 4 - H312, Acute Tox. 4 - H332, Aquatic Acute 1 - H400, Aquatic Chronic 1 - H410, Repr. 2 - H361d, STOT RE 2 - H373, Skin Irrit. 2 - H315, Skin Sens. 1 - H317
Sulcotrione	ConvAS	Aquatic Acute 1 - H400, Aquatic Chronic 1 - H410, Repr. 2 - H361d, STOT RE 2 - H373, Skin Sens. 1A - H317
Sulfosulfuron	ConvAS	Aquatic Acute 1 - H400, Aquatic Chronic 1 - H410
Sulfoxaflor	ConvAS	Acute Tox. 4 - H302, Aquatic Acute 1 - H400, Aquatic Chronic 1 - H410
Talc E553B	ConvAS
tau-Fluvalinate	ConvAS	Acute Tox. 4 - H302, Aquatic Acute 1 - H400, Aquatic Chronic 1 - H410, Skin Irrit. 2 - H315
Tebuconazole	ConvAS	Acute Tox. 4 - H302, Aquatic Acute 1 - H400, Aquatic Chronic 1 - H410, Repr. 2 - H361d
Tebufenozide	ConvAS	Aquatic Chronic 2 - H411
Tebufenpyrad	ConvAS	Acute Tox. 3 - H301, Acute Tox. 4 - H332, Aquatic Acute 1 - H400, Aquatic Chronic 1 - H410, STOT RE 2 - H373, Skin Sens. 1B - H317
Tefluthrin	ConvAS	Acute Tox. 1 - H330, Acute Tox. 2 - H300, Acute Tox. 2 - H310, Aquatic Acute 1 - H400, Aquatic Chronic 1 - H410
Tembotrione	ConvAS	Aquatic Acute 1 - H400, Aquatic Chronic 1 - H410, Repr. 2 - H361d, STOT RE 2 - H373, Skin Sens. 1 - H317
Terbuthylazine	ConvAS	Acute Tox. 4 - H302, Aquatic Acute 1 - H400, Aquatic Chronic 1 - H410, STOT RE 2 - H373
Terpenoid blend QRD-460	ConvAS
Tetraconazole	ConvAS	Acute Tox. 4 - H302, Acute Tox. 4 - H332, Aquatic Chronic 2 - H411
Thiabendazole	ConvAS	Aquatic Acute 1 - H400, Aquatic Chronic 1 - H410
Thiencarbazone-methyl	ConvAS
Thifensulfuron-methyl	ConvAS	Aquatic Acute 1 - H400, Aquatic Chronic 1 - H410
Tolclofos-methyl	ConvAS	Aquatic Acute 1 - H400, Aquatic Chronic 1 - H410, Skin Sens. 1 - H317
Tri-allate	ConvAS	Acute Tox. 4 - H302, Aquatic Acute 1 - H400, Aquatic Chronic 1 - H410, STOT RE 2 - H373, Skin Sens. 1 - H317
Tribenuron (aka metometuron)	ConvAS	Aquatic Acute 1 - H400, Aquatic Chronic 1 - H410, Skin Sens. 1 - H317
Triclopyr	ConvAS
Trifloxystrobin	ConvAS	Aquatic Acute 1 - H400, Aquatic Chronic 1 - H410, Skin Sens. 1 - H317
Triflusulfuron	ConvAS
Trinexapac (aka cimetacarb ethyl)	ConvAS
Triticonazole	ConvAS	Aquatic Chronic 2 - H411
Tritosulfuron	ConvAS	Aquatic Acute 1 - H400, Aquatic Chronic 1 - H410, Skin Sens. 1 - H317
Urea	ConvAS
Valifenalate (formerly Valiphenal)	ConvAS
Zinc phosphide	ConvAS
Ziram	ConvAS	Acute Tox. 2 - H330, Acute Tox. 4 - H302, Aquatic Acute 1 - H400, Aquatic Chronic 1 - H410, Eye Dam. 1 - H318, STOT RE 2 - H373, STOT SE 3 - H335, Skin Sens. 1 - H317
Zoxamide	ConvAS	Aquatic Acute 1 - H400, Aquatic Chronic 1 - H410, Skin Sens. 1 - H317
